# Supplementary material for: Investigation of the lncRNA THOR in Mice Highlights the Importance of Noncoding RNAs in Mammalian Male Reproduction
Source: MDPI journal article supplement (doi:10.3390/biomedicines9080859), 2021-07-22
Supplement: s1 [file s1]

Table S1: The primers of potential off-target sites (POTS) used in this study

|        |      | Potential Off Target Site       | Number of mismatch | Position          | PCR Primer                                           |
|--------|------|---------------------------------|--------------------|-------------------|------------------------------------------------------|
| sgRNA1 | OT1  | tAaCCTgAAGGG<br>GTtTACGG - GGG  | 4                  | Chr19:<br>-33316  | F:AAATGGATTGGGAGCCAGGG<br>R:ACCCCTGGGTATTTGCCTA      |
|        | OT2  | cAGCCTTA tGGG<br>tgCTACGG - GGG | 4                  | Chr5:<br>+15099   | F:TCCCTCTGCATACCCTCCTC<br>R:TATTAAATCCGCTCCCCCGC     |
|        | OT3  | GAcCCTTctGGG<br>GgCTACGG - AGG  | 4                  | Chr6:<br>+128637  | F:TGGCTGCCTGTGTAAGCAAGTC<br>R:CCTGCCTGGAGGTTTCACTGTT |
| sgRNA2 | OT4  | tgCACATCAaGC<br>ATtGGCAT - TGG  | 4                  | Chr9:<br>-36820   | F:GGTGTGCTGCTCCCAATGCTAT<br>R:GGCCACTGTACTTGCTCCTCCT |
|        | OT5  | GAtACATCtgGC<br>ATgGGCAT - CGG  | 4                  | Chr12:<br>-122809 | F:TGGCGCATCTACCAGATTTC<br>R:ACCCAGAGTGAGGCACAGTA     |
|        | OT6  | GACtgATgACaC<br>ATCGGCAT - GGG  | 4                  | Chr11:<br>-56255  | F:GCACGCTGGGGACATAACTT<br>R:GCATCCCCAGGAGGAGTAGA     |
|        | OT7  | GACA gAgCACcC<br>ATaGGCAT - AGG | 4                  | Chr15:<br>+39770  | F:CCAGAGGAAGACCAACCGTGT<br>R:ACATTCCCAAGGCAGTGGAACT  |
|        | OT8  | GACA gATgACTc<br>ATgGGCAT - CGG | 4                  | Chr13:<br>+85077  | F:GGAAGTGCAGATGTCCCCTC<br>R:ATGATTGCTGCCACGGGTAA     |
|        | OT9  | GACACA gCACGC<br>caaGGCAT - TGG | 4                  | Chr15:<br>-149496 | F:CTACCTGCTTTCCCGTGTGT<br>R:AAGGCTCACCCTGGACAATG     |
|        | OT10 | GACACATCtgGg<br>ATtGGCAT - GGG  | 4                  | Chr16:<br>+147218 | F:TTGGGCATCTTGCTCTCCAG<br>R:GCTGAACCCAGAGCTTCACT     |
